# Supplementary material for: High-CO2 Treatment Prolongs the Postharvest Shelf Life of Strawberry Fruits by Reducing Decay and Cell Wall Degradation
Source: MDPI journal article supplement (doi:10.3390/foods10071649), 2021-07-16
Supplement: s1 [file s1]

# Supplementary Information

## High-CO<sub>2</sub> Treatment Prolongs the Postharvest Shelf Life of Strawberry Fruits by Reducing Decay and Cell Wall Degradation

Hyang-Lan Eum <sup>1</sup>, Seung-Hyun Han <sup>2</sup> and Eun-Jin Lee <sup>2,3\*</sup>

<sup>1</sup> Postharvest Technology Division, National Institute of Horticultural and Herbal Science, Rural Development Administration, Wanju 55365, Republic of Korea; eumhl@hanmail.net (H.L.E.)

<sup>2</sup> Department of Agriculture, Forestry and Bioresources, College of Agriculture and Life Sciences, Seoul National University, Seoul 08826, Republic of Korea; ejinlee73@naver.com (S.H.H.)

<sup>3</sup> Research Institute of Agriculture and Life Sciences, Seoul National University, Seoul 08826, Republic of Korea

\* Correspondence: ejinlee3@snu.ac.kr; Tel.: +82-2-880-4565

**Table S1.** Candidate primers of housekeeping gene and cell wall degradation-related genes of ‘Seolhyang’ strawberry fruit.

| Gene       | Acession No. | Forward Primer (5' to 3') | Reverse Primer (5' to 3') | Size |
|------------|--------------|---------------------------|---------------------------|------|
| <i>18s</i> | X15590       | GTGCTCAAAGCAAGCCTACG      | ATCTGATCGTCTTCGAGCCC      | 241  |
| <i>PE</i>  | AY324809     | GAAACCTGTGGTTGCCCTCT      | TTTCAAACAACACCAATGCG      | 256  |
| <i>PG</i>  | EF441274     | GCAACAACGCCGAGTAGAGT      | TGCAGTCGTTGTCTTTCCAAG     | 247  |
| <i>PL</i>  | U63550       | ATGCTGTTGGGGCATAGTGA      | TTCGCAAAACGGTTGTTAGG      | 236  |
| <i>LOX</i> | AJ578035     | CTGATGTGGCCTTCCTCAA       | TGAGGTGCTGGGATAGAGCA      | 284  |
| <i>EG</i>  | AJ006348     | AACTTCGCTATCGTTCCTGCTT    | GGGTTTGGATTCGGACTCAG      | 297  |
| <i>EXP</i> | AF159563     | AGAGGAGGGGGATCGAGATT      | AGAACAAAGCAACTGCCCCA      | 271  |
| <i>XTH</i> | GQ367550     | CATCCCAATCCGAGTGTTCA      | CTCCTTCTGATCCCACCACC      | 250  |
